# Supplementary material
Source: MDPI journal article supplement (https://www.mdpi.com/2075-163X/12/1/37)
Supplement: s1 [file s1]

Archive with 2 entries (2 files):
- minerals-1489935-Supplementary Tables_new.xlsx
- minerals-1489935-supplementary.pdf
