# Supplementary material
Source: MDPI journal article supplement (https://www.mdpi.com/2075-163X/12/1/37)
Supplement: s1 [file s1 › minerals-1489935-Supplementary Tables_new.xlsx]

## Sheet: Supplementary Table S1
	SUPPLEMENTARY TABLE S1. BULK COMPOSITION OF SCORIA FROM THE 1941 ERUPTION, TOLBACHIK VOLCANO, KAMCHATKA
	XRF
	Al2O3	wt%	14.8225
	CaO	wt%	9.8545
	Fe2O3	wt%	10.61
	K2O	wt%	1.345
	MgO	wt%	8.7475
	MnO	wt%	0.1755
	Na2O	wt%	2.83
	P2O5	wt%	0.381
	SiO2	wt%	50.875
	TiO2	wt%	1.2275
	Total	wt%	100.33
	LOI 1000	wt%	-0.54
	ICP-MS
	Ba	ppm	312.55
	Be	ppm	0.95
	Bi	ppm	0.05
	Cd	ppm	0.068
	Ce	ppm	26.58
	Co	ppm	46.635
	Cr	ppm	575
	Cs	ppm	0.9745
	Cu	ppm	169.45
	Dy	ppm	4.513
	Er	ppm	2.582
	Eu	ppm	1.3803
	Ga	ppm	17.065
	Gd	ppm	4.761
	Hf	ppm	3.205
	Ho	ppm	0.8838
	In	ppm	0.0559
	La	ppm	10.75
	Li	ppm	10.25
	Lu	ppm	0.362
	Mo	ppm	1.43
	Nb	ppm	3.1955
	Nd	ppm	19.025
	Ni	ppm	155.25
	Pb	ppm	3.275
	Pr	ppm	3.9935
	Rb	ppm	30.095
	Sb	ppm	0.17
	Sc	ppm	34.3
	Sm	ppm	4.642
	Sn	ppm	0.99
	Sr	ppm	301.45
	Ta	ppm	0.206
	Tb	ppm	0.72195
	Th	ppm	1.127
	Ti	ppm	7466
	Tl	ppm	0.0605
	Tm	ppm	0.36055
	U	ppm	0.6995
	V	ppm	292.75
	W	ppm	0.35
	Y	ppm	25.235
	Yb	ppm	2.4325
	Zn	ppm	88.35
	Zr	ppm	133.5

## Sheet: Supplementary Table S2
			SUPPLEMENTARY TABLE S2. COMPOSITIONS OF SILICATE MELT INCLUSIONS IN OLIVINE AND BASALTIC GLASS, THE 1941 ERUPTION, TOLBACHIK VOLCANO, KAMCHATKA
	All concentrations are in wt. %			n/m - not measured		<dl - below detection limit
	Volcano	Year of eruption	Melt inclusion or glass	Label		Na2O	MgO	Al2O3	SiO2	P2O5	K2O	CaO	TiO2	MnO	FeO	Cl	S		TOTAL
	Tolbachik	1941	Inclusion	Spectrum_V_8		3.22	3.99	12.57	45.77	0.5	2.71	4.24	2.22	0.44	23.09	0.069	0.1272		98.9462
	Tolbachik	1941	Inclusion	Spectrum_V_28		1.43	5.05	12.1	51.82	0.39	0.93	12.52	1.16	0.27	10.51	0.103	0.1364		96.4194
	Tolbachik	1941	Inclusion	Spectrum_V_30		2.5	5.64	13.92	49.19	0.4	1.28	10.78	1.16	0.23	8.89	0.083	0.112		94.185
	Tolbachik	1941	Inclusion	Spectrum_V_56		3.59	3.96	12.59	45.32	0.59	2.55	4.25	2.25	0.42	23.41	0.07	0.21		99.44
	Tolbachik	1941	Inclusion	Spectrum_V_57		3.34	3.81	12.48	45.14	0.5	2.66	4.21	2.2	0.43	23.33	0.06	0.22		98.66
	Tolbachik	1941	Inclusion	Spectrum_V_63		2.08	5.27	11.94	50.28	0.57	0.93	12.09	1.09	0.2	10.42	0.11	0.19		95.35
	Tolbachik	1941	Inclusion	Spectrum_V_64		1.99	6.81	11.37	48.91	0.3	0.97	10.91	1.1	0.22	11.01	0.1	0.18		94.05
	Tolbachik	1941	Inclusion	Spectrum_V_65		2.19	11.33	10.74	48.52	0.29	0.79	8.54	0.97	0.31	10.32	0.1	0.15		94.38
	Tolbachik	1941	Inclusion	Spectrum_V_66		2.51	5.5	14.72	49.63	0.44	1.27	11.53	1.3	<dl	7.32	0.08	0.18		94.67
	Tolbachik	1941	Inclusion	Spectrum_V_76		3.53	3.08	15.08	54.59	0.75	2.86	6	1.57	0.19	8.22	0.07	0.17		96.83
	Tolbachik	1941	Inclusion	Spectrum_G_1		n/m	n/m	n/m	n/m	n/m	n/m	n/m	n/m	n/m	n/m	0.13	0.24
	Tolbachik	1941	Inclusion	Spectrum_G_2		n/m	n/m	n/m	n/m	n/m	n/m	n/m	n/m	n/m	n/m	0.18	0.15
	Tolbachik	1941	Inclusion	Spectrum_G_3		n/m	n/m	n/m	n/m	n/m	n/m	n/m	n/m	n/m	n/m	0.11	0.18
	Tolbachik	1941	Inclusion	Spectrum_G_4		n/m	n/m	n/m	n/m	n/m	n/m	n/m	n/m	n/m	n/m	0.1	0.14
	Tolbachik	1941	Inclusion	Spectrum_G_7		n/m	n/m	n/m	n/m	n/m	n/m	n/m	n/m	n/m	n/m	0.09	0.18
	Tolbachik	1941	Inclusion	Spectrum_G_8		n/m	n/m	n/m	n/m	n/m	n/m	n/m	n/m	n/m	n/m	0.14	0.23
	Tolbachik	1941	Inclusion	Spectrum_G_9		n/m	n/m	n/m	n/m	n/m	n/m	n/m	n/m	n/m	n/m	0.12	0.23
	Tolbachik	1941	Inclusion	Spectrum_G_10		n/m	n/m	n/m	n/m	n/m	n/m	n/m	n/m	n/m	n/m	0.09	0.24
	Tolbachik	1941	Inclusion	Spectrum_G_12		n/m	n/m	n/m	n/m	n/m	n/m	n/m	n/m	n/m	n/m	0.12	0.14
	Tolbachik	1941	Inclusion	Spectrum_G_13		n/m	n/m	n/m	n/m	n/m	n/m	n/m	n/m	n/m	n/m	0.1	0.24
	Tolbachik	1941	Inclusion	Spectrum_G_14		n/m	n/m	n/m	n/m	n/m	n/m	n/m	n/m	n/m	n/m	0.11	0.18
	Tolbachik	1941	Inclusion	Spectrum_G_16		n/m	n/m	n/m	n/m	n/m	n/m	n/m	n/m	n/m	n/m	0.12	0.33
	Tolbachik	1941	Inclusion	Spectrum_G_17		n/m	n/m	n/m	n/m	n/m	n/m	n/m	n/m	n/m	n/m	0.14	0.32
	Tolbachik	1941	Inclusion	Spectrum_G_19		n/m	n/m	n/m	n/m	n/m	n/m	n/m	n/m	n/m	n/m	0.15	0.21
	Tolbachik	1941	Inclusion	Spectrum_G_20		n/m	n/m	n/m	n/m	n/m	n/m	n/m	n/m	n/m	n/m	0.12	0.21
	Tolbachik	1941	Inclusion	Spectrum_G_21		n/m	n/m	n/m	n/m	n/m	n/m	n/m	n/m	n/m	n/m	0.13	0.25
	Tolbachik	1941	Inclusion	Spectrum_G_23		n/m	n/m	n/m	n/m	n/m	n/m	n/m	n/m	n/m	n/m	0.07	0.14
	Tolbachik	1941	Inclusion	Spectrum_G_25		n/m	n/m	n/m	n/m	n/m	n/m	n/m	n/m	n/m	n/m	0.14	0.21
	Tolbachik	1941	Inclusion	Spectrum_G_26		n/m	n/m	n/m	n/m	n/m	n/m	n/m	n/m	n/m	n/m	0.1	0.17
	Tolbachik	1941	Inclusion	Spectrum_G_27		n/m	n/m	n/m	n/m	n/m	n/m	n/m	n/m	n/m	n/m	0.12	0.23
	Tolbachik	1941	Inclusion	Spectrum_G_28		n/m	n/m	n/m	n/m	n/m	n/m	n/m	n/m	n/m	n/m	0.13	0.32
	Tolbachik	1941	Inclusion	Spectrum_G_29		n/m	n/m	n/m	n/m	n/m	n/m	n/m	n/m	n/m	n/m	0.1	0.21
	Tolbachik	1941	Inclusion	Spectrum_G_30		n/m	n/m	n/m	n/m	n/m	n/m	n/m	n/m	n/m	n/m	0.08	0.23
	Tolbachik	1941	Inclusion	Spectrum_G_31		n/m	n/m	n/m	n/m	n/m	n/m	n/m	n/m	n/m	n/m	0.1	0.2
	Tolbachik	1941	Inclusion	Spectrum_G_33		n/m	n/m	n/m	n/m	n/m	n/m	n/m	n/m	n/m	n/m	0.11	0.19
	Tolbachik	1941	Inclusion	Spectrum_G_34		n/m	n/m	n/m	n/m	n/m	n/m	n/m	n/m	n/m	n/m	0.1	0.22
	Tolbachik	1941	Inclusion	Spectrum_G_35		n/m	n/m	n/m	n/m	n/m	n/m	n/m	n/m	n/m	n/m	0.06	0.19
	Tolbachik	1941	Inclusion	Spectrum_G_45		n/m	n/m	n/m	n/m	n/m	n/m	n/m	n/m	n/m	n/m	0.08	0.17
	Tolbachik	1941	Inclusion	Spectrum_G_46		n/m	n/m	n/m	n/m	n/m	n/m	n/m	n/m	n/m	n/m	0.08	0.15
	Tolbachik	1941	Inclusion	Spectrum_E_1		2.47698	7.28629	14.6075	47.4169	<dl	1.05	11.3444	1.14136	0.176513	8.41554	0.161226	0.179205		94.589
	Tolbachik	1941	Inclusion	Spectrum_E_2		2.17437	8.24153	12.6324	44.906	<dl	0.780041	12.1055	0.794314	0.193546	11.4061	0.089812	0.165215		93.8063
	Tolbachik	1941	Inclusion	Spectrum_E_2a		2.22167	8.1311	12.6292	44.8527	<dl	0.800778	12.0113	0.816137	0.149094	11.5147	0.081562	0.170144		93.6655
	Tolbachik	1941	Inclusion	Spectrum_E_3		2.44861	6.70629	15.213	45.3399	<dl	0.671609	14.0748	1.19051	0.15497	8.16365	0.152081	0.22096		94.6972
	Tolbachik	1941	Inclusion	Spectrum_E_4		2.92473	6.76925	15.9152	47.4298	<dl	1.20108	11.7368	1.3465	0.107059	7.14266	0.092843	0.16061		95.0991
	Tolbachik	1941	Inclusion	Spectrum_E_5		2.42214	6.98078	16.0516	46.5935	<dl	0.760797	14.2836	1.17114	0.104626	6.55358	0.130256	0.192519		95.5977
	Tolbachik	1941	Inclusion	Spectrum_E_6		2.24871	7.77796	14.5099	45.3757	<dl	0.756681	14.6224	1.03927	0.162801	8.96256	0.123434	0.171624		96.045
	Tolbachik	1941	Inclusion	Spectrum_E_7		2.56996	7.41613	15.1898	45.6241	<dl	0.828745	13.8692	1.1314	0.130598	7.73648	0.132842	0.215749		95.2169
	Tolbachik	1941	Inclusion	Spectrum_E_9		2.43952	6.85288	14.7277	45.595	<dl	0.787476	14.0998	1.0993	0.169718	8.71871	0.083037	0.211867		95.1319
	Tolbachik	1941	Inclusion	Spectrum_E_10		1.68289	8.76948	13.0284	46.3597	<dl	0.884083	14.4443	0.798342	0.133945	7.18276	0.065891	0.178342		93.8214
	Tolbachik	1941	Inclusion	Spectrum_E_11		1.61227	9.10952	10.3213	44.539	<dl	0.541713	12.8075	0.737749	0.188554	12.2273	0.087732	0.175916		92.6516
	Tolbachik	1941	Inclusion	Spectrum_E_12		2.23541	8.3936	13.9294	45.8366	<dl	0.749832	13.0813	0.999049	0.143566	8.43617	0.114979	0.202392		94.4588
	Tolbachik	1941	Inclusion	Spectrum_E_13		2.40979	7.83459	14.3387	45.1378	<dl	0.767992	13.5425	1.04369	0.14074	8.76273	0.106995	0.200336		94.5864
	Tolbachik	1941	Inclusion	Spectrum_E_14		2.74885	7.43096	14.064	47.8349	<dl	1.43192	9.57359	1.73422	0.157688	9.47869	0.072481	0.10254		94.8093
	Tolbachik	1941	Inclusion	Spectrum_E_15		2.69609	7.21085	14.8847	47.3205	<dl	1.3248	10.7434	1.32393	0.144411	9.20984	0.104419	0.152903		95.3875
	Tolbachik	1941	Inclusion	Spectrum_E_16		3.07717	6.54652	14.9013	49.3982	<dl	2.11719	8.78033	1.8173	0.125979	8.51177	0.057577	0.0618644		95.5077
	Tolbachik	1941	Inclusion	Spectrum_E_17		2.2218	8.00526	14.1424	46.328	<dl	0.702157	12.7847	1.05652	0.116583	6.87632	0.100826	0.211911		92.897
	Tolbachik	1941	Inclusion	Spectrum_E_18		1.67546	7.35724	13.4995	45.0458	<dl	0.640596	13.9409	1.1463	0.145748	8.90441	0.075433	0.131041		92.8028
	Tolbachik	1941	Inclusion	Spectrum_E_19		2.11461	7.76494	12.9667	46.2737	<dl	0.713714	12.438	0.89702	0.123943	8.65871	0.092289	0.231908		92.6574
	Tolbachik	1941	Inclusion	Spectrum_E_20		2.29534	5.55677	13.9414	46.954	<dl	0.76964	12.9189	1.13727	0.142061	8.61844	0.127445	0.235111		93.1029
	Tolbachik	1941	Inclusion	Spectrum_E_21		2.51914	6.82622	14.0223	48.0073	<dl	1.35402	10.2026	1.49741	0.12912	9.54877	0.122953	0.184225		94.7141
	Tolbachik	1941	Inclusion	Spectrum_E_22		1.71759	7.65677	14.2002	45.3859	<dl	0.911973	14.2013	1.31568	0.123915	7.10486	0.061686	0.125388		93.063
	Tolbachik	1941	Inclusion	Spectrum_E_23		3.77287	5.9341	15.5103	50.9219	<dl	1.4549	10.5289	1.58894	0.149638	7.44926	0.047641	0.0093496		97.4301
	Tolbachik	1941	Inclusion	Spectrum_E_24		1.72555	6.54848	14.1716	45.7689	<dl	0.795398	15.4341	1.12534	0.132013	7.03266	0.118018	0.227973		93.4235
	Tolbachik	1941	Inclusion	Spectrum_E_25		1.40266	7.21176	13.0319	44.8969	<dl	1.61959	15.1777	1.17247	0.151965	8.05775	0.130365	0.352137		93.7504
	Tolbachik	1941	Inclusion	Spectrum_E_26		1.8626	8.54787	15.3581	45.0898	<dl	0.946963	14.4113	0.884747	0.103978	6.96323	0.0909	0.148265		94.7113
	Tolbachik	1941	Inclusion	Spectrum_E_27		2.94155	7.20659	15.9765	46.3378	<dl	0.802851	14.1024	1.0569	0.092432	7.6893	0.121372	0.0813348		96.5672
	Tolbachik	1941	Inclusion	Spectrum_E_28		1.94279	8.46468	13.0911	46.774	<dl	0.6307	13.6197	0.96973	0.121615	7.0756	0.097702	0.180899		93.2944
	Tolbachik	1941	Inclusion	Spectrum_E_29		1.6535	9.04567	12.6573	45.0536	<dl	0.513182	13.8368	0.993241	0.116681	7.20544	0.087607	0.144821		91.5826
	Tolbachik	1941	Inclusion	MZ_Ol_Sp_97		1.99	7.7	12.33	46.38	<dl	0.72	12.47	0.99	<dl	8.36	0.13	0.23		91.3
	Tolbachik	1941	Inclusion	MZ_Ol_Sp_101		2.42	7.58	14.62	46.87	<dl	1.03	13.14	1.09	<dl	8.35	0.12	0.23		95.45
	Tolbachik	1941	Inclusion	MZ_Ol_Sp_107		2.23	6.03	13.28	46.71	<dl	0.73	13.26	1.02	<dl	8.67	0.18	0.32		92.43
	Tolbachik	1941	Inclusion	MZ_Ol_Sp_109		2.49	6.84	15.09	46.28	<dl	1.01	13.45	1.13	<dl	6.88	0.16	0.27		93.6
	Tolbachik	1941	Inclusion	MZ_Ol_Sp_116		2.44	7.11	14.11	48.12	<dl	0.5	13.73	1.01	<dl	7.08	0.12	0.27		94.49
	Tolbachik	1941	Inclusion	MZ_Ol_Sp_120		2.2	6.3	13.24	46.38	<dl	0.55	12.97	0.94	<dl	8.3	0.12	0.23		91.23
	Tolbachik	1941	Inclusion	MZ_Ol_Sp_126		2.3	6.89	15.16	45.95	<dl	0.77	13.73	1.08	<dl	6.54	0.14	0.21		92.77
	Tolbachik	1941	Inclusion	MZ_Ol_Sp_138		2.35	8.06	14	47.88	<dl	0.53	12.51	0.86	<dl	7.07	0.13	0.22		93.61
	Tolbachik	1941	Inclusion	MZ_Ol_Sp_159		2.29	8.14	13.73	46.68	<dl	0.8	12.64	0.93	<dl	8.63	0.17	0.28		94.29
	Tolbachik	1941	Inclusion	MZ_Ol_Sp_1		2.23	6.19	13.47	46.59	<dl	0.8	12.81	1.11	<dl	8.04	0.11	0.27		91.62
	Tolbachik	1941	Inclusion	MZ_Ol_Sp_2		2.28	5.28	14.37	46.74	<dl	0.81	13.6	0.93	<dl	7.65	0.12	0.29		92.07
	Tolbachik	1941	Inclusion	MZ_Ol_Sp_7		2.28	7.8	13.57	46.05	<dl	0.77	12.01	0.99	<dl	8.54	0.12	0.25		92.38
	Tolbachik	1941	Inclusion	MZ_Ol_Sp_19		2.25	5.9	13.53	45.66	<dl	0.79	13.33	1.11	<dl	8.88	0.13	0.26		91.84
	Tolbachik	1941	Inclusion	MZ_Ol_Sp_21		2.1	6.67	13.45	47.07	<dl	0.66	12.74	0.85	<dl	8.34	0.11	0.32		92.31
	Tolbachik	1941	Inclusion	MZ_Ol_Sp_25		2.4	5.46	14.23	45.76	<dl	0.99	12.31	0.97	<dl	8.46	0.13	0.24		90.95
	Tolbachik	1941	Inclusion	MZ_Ol_Sp_47		2.21	7.14	13.39	46.18	<dl	0.71	11.79	0.94	<dl	7.76	0.12	0.25		90.49
	Tolbachik	1941	Inclusion	Sp 20		2.65552	3.93017	15.7205	48.4992	0.206227	1.19257	13.6564	1.11779	0.232423	7.17865	0.15	0.22		94.3895
	Tolbachik	1941	Inclusion	Sp 22		2.45332	7.47894	14.3223	47.5365	0.206227	0.84323	12.2432	1.1011	<dl	8.02774	0.12	0.21		94.2125
	Tolbachik	1941	Inclusion	Sp 24		2.38592	7.19703	14.7002	47.3012	0.229141	0.99983	13.5025	0.984319	<dl	7.77044	0.13	0.24		95.0705
	Tolbachik	1941	Inclusion	Sp 26		2.35896	7.5121	14.2278	47.9002	0.160398	0.903461	13.5585	0.950952	<dl	8.56807	0.11	0.18		96.1404
	Tolbachik	1941	Inclusion	Sp 28		2.27808	6.48396	13.3964	48.3923	0.137484	0.758907	13.3066	0.984319	<dl	8.28504	0.11	0.25		94.0231
	Tolbachik	1941	Inclusion	Sp 30		2.35896	7.57843	13.7365	48.5848	0.0916562	0.758907	13.6004	0.950952	<dl	7.95055	0.16	0.3		95.6112
	Tolbachik	1941	Inclusion	Sp 32		2.27808	6.10255	14.2089	47.5579	0.11457	0.987784	13.1247	0.984319	<dl	8.02774	0.09	0.23		93.3866
	Tolbachik	1941	Inclusion	Sp 34		2.29156	6.88195	13.7932	47.8788	0.183312	0.758907	13.1247	1.01769	<dl	8.42656	0.09	0.24		94.3567
	Tolbachik	1941	Inclusion	Sp 36		2.65552	6.40104	15.4749	47.3868	0.137484	1.21666	12.523	0.950952	<dl	7.5646	0.12	0.23		94.3109
	Tolbachik	1941	Inclusion	Sp 38		2.3994	6.84878	15.1159	45.8036	0.297883	0.99983	13.5724	1.001	<dl	8.01488	0.11	0.27		94.0537
	Tolbachik	1941	Inclusion	Sp 39		2.54768	4.51058	16.1173	46.0176	0.183312	1.04801	14.9997	1.13447	<dl	6.88276	0.11	0.25		93.4413
	Tolbachik	1941	Inclusion	Sp 41		2.1972	8.19201	13.9633	48.2425	0.0229141	0.638445	12.8169	0.950952	<dl	7.75758	0.13	0.21		94.7818
	Tolbachik	1941	Inclusion	Sp 43		2.70943	4.65983	15.3993	49.6545	0.11457	0.855276	12.8868	1.1011	<dl	7.21725	0.12	0.27		94.5981
	Tolbachik	1941	Inclusion	Sp 45		2.42636	7.72768	14.549	48.5206	0.0916562	0.84323	12.3971	0.984319	<dl	7.75758	0.12	0.22		95.2976
	Tolbachik	1941	Inclusion	Sp 47		2.5342	8.07592	14.6624	47.3012	0.0916562	1.0962	12.1173	1.001	<dl	8.54234	0.12	0.21		95.4222
	Tolbachik	1941	Inclusion	Sp 49		2.1972	6.69954	13.1886	48.7346	0.229141	0.795045	13.0967	1.05105	<dl	8.67099	0.15	0.22		94.6628
	Tolbachik	1941	Inclusion	Sp 51		3.26211	5.78747	16.2873	50.9167	0.389539	1.46963	10.9559	1.3013	<dl	9.00548	0.07	0.01		99.3755
	Tolbachik	1941	Inclusion	Sp 52		2.57464	7.26336	15.3804	47.7077	0.206227	1.08415	12.565	1.01769	<dl	6.67692	0.12	0.2		94.476
	Tolbachik	1941	Inclusion	Sp 54		2.38592	3.9965	15.1159	48.1569	0.137484	0.915507	14.398	1.11779	<dl	7.84763	0.13	0.26		94.0716
	Tolbachik	1941	Inclusion	Sp 56		2.02197	7.66135	12.943	46.4027	0.137484	0.722768	12.1313	1.001	<dl	8.13066	0.08	0.37		91.1521
	Tolbachik	1941	Inclusion	Sp 58		2.54768	6.74928	15.0403	46.7878	0.11457	1.38531	13.8103	1.05105	<dl	8.0792	0.13	0.24		95.5654
	Tolbachik	1941	Inclusion	Sp 60		2.54768	5.65481	15.7016	46.2101	0.252055	1.59009	13.0268	1.16784	<dl	6.61259	0.11	0.25		92.7635
	Tolbachik	1941	Inclusion	Sp 62		1.50973	2.62012	14.0577	45.8892	0.160398	0.987784	14.1042	0.950952	<dl	6.574	0.11	0.27		86.8541
	Tolbachik	1941	Inclusion	Sp 64		3.24863	5.19048	15.2103	52.5426	0.435367	2.33695	9.93447	2.16884	<dl	12.003	0.12	0.09		103.071
	Tolbachik	1941	Inclusion	Sp 66		2.68247	7.0312	15.7016	46.8091	0.11457	0.963691	13.7963	1.15115	<dl	7.51314	0.16	0.31		95.7633
	Tolbachik	1941	Inclusion	Sp 67		2.68247	6.41762	16.2495	47.8146	0.160398	0.891414	14.5799	1.2012	<dl	7.42309	0.11	0.29		97.4203
	Tolbachik	1941	Inclusion	Sp 69		3.76086	6.0528	19.8396	46.7878	0.297883	1.60214	11.6975	1.16784	<dl	6.07227	0.15	0.31		97.2786
	Tolbachik	1941	Inclusion	Sp 71		2.65552	4.06284	15.1536	49.1197	0.183312	0.855276	13.7963	1.06774	<dl	8.05347	0.16	0.29		94.9478
	Tolbachik	1941	Inclusion	Sp 73		2.30504	6.03621	14.2467	48.0714	0.0687422	0.807091	13.4045	1.06774	<dl	8.32364	0.11	0.34		94.3311
	Tolbachik	1941	Inclusion	Sp 75		2.25112	3.64826	13.6987	45.3116	0.252055	0.795045	14.0762	1.21789	<dl	9.21132	0.13	0.27		90.4622
	Tolbachik	1941	Inclusion	Sp 77		2.25112	8.04276	13.4531	48.7987	0.0916562	0.566169	12.593	0.917586	<dl	8.58094	0.11	0.27		95.2951
	Tolbachik	1941	Inclusion	Sp 79		2.48028	6.66637	14.5112	48.6276	0.183312	0.819138	13.5864	1.1011	<dl	8.19499	0.11	0.28		96.1704
	Tolbachik	1941	Inclusion	Sp 81		2.77683	5.32315	17.0242	49.248	0.160398	1.19257	15.0556	1.11779	<dl	6.22665	0.1	0.23		98.1252
	Tolbachik	1941	Inclusion	Sp 83		2.6016	8.88849	14.8135	44.3061	0.137484	0.84323	12.1872	1.78512	0.232423	9.53294	0.1	0.36		95.3281
	Tolbachik	1941	Inclusion	Sp 85		2.23764	7.7111	14.3601	48.4778	0.160398	1.10824	14.0342	1.001	<dl	7.12719	0.11	0.22		96.2177
	Tolbachik	1941	Inclusion	Sp 86		2.5342	5.83722	16.6274	46.6808	0.11457	1.37326	14.8877	1.01769	<dl	7.14006	0.21	0.25		96.2129
	Tolbachik	1941	Inclusion	Sp 88		2.61508	7.31311	15.815	47.9644	0.183312	0.855276	12.0333	1.08442	<dl	8.3751	0.11	0.25		96.239
	Tolbachik	1941	Inclusion	Sp 91		1.98153	5.24023	14.0955	48.1783	0.0916562	1.26484	15.8952	1.03437	<dl	7.98915	0.12	0.25		95.7708
	Tolbachik	1941	Inclusion	Sp 99		2.52072	4.17892	14.9647	50.3177	0.160398	0.939599	14.412	1.01769	<dl	7.89909	0.11	0.24		96.4108
	Tolbachik	1941	Inclusion	Sp 100		2.56116	3.97992	15.3426	49.8684	0.0687422	0.831184	14.8317	1.01769	<dl	7.42309	0.09	0.26		95.9245
	Tolbachik	1941	Inclusion	Sp 106		2.17024	6.30154	13.2264	48.05	0.160398	0.746861	13.6004	0.984319	0.296985	9.30137	0.09	0.22		94.8385
	Tolbachik	1941	Inclusion	Sp 109		2.35896	8.22517	13.9633	48.05	0.229141	1.03597	12.1592	0.934269	<dl	8.16926	0.11	0.25		95.1252
	Tolbachik	1941	Inclusion	Sp 111		2.58812	4.1955	15.5126	48.4778	0.229141	1.12029	13.3346	1.03437	<dl	7.53887	0.11	0.24		94.0314
	Tolbachik	1941	Inclusion	Sp 113		3.01947	2.5372	17.9123	49.3336	0.206227	1.33712	13.7124	1.18452	<dl	5.77637	0.1	0.26		95.0192
	Tolbachik	1941	Inclusion	Sp 122		2.73639	7.04778	16.7597	47.0445	0.206227	1.16848	14.5379	1.06774	<dl	6.18805	0.11	0.24		96.7568
	Tolbachik	1941	Inclusion	Sp 124		1.92761	8.22517	12.7729	48.0928	0.137484	0.903461	14.7618	1.01769	<dl	8.04061	0.05	0.26		95.8795
	Tolbachik	1941	Inclusion	Sp 126		2.3994	8.35784	14.0766	48.1569	0.206227	0.84323	12.4111	1.01769	<dl	8.47802	0.1	0.24		95.9471
	Tolbachik	1941	Inclusion	Sp 128		2.2646	7.99301	13.5098	46.4241	0.229141	0.819138	12.2432	0.917586	<dl	8.43942	0.17	0.2		92.8399
	Tolbachik	1941	Inclusion	Sp 131		2.27808	7.0312	13.7176	47.9002	0.0687422	0.819138	13.2226	1.1011	<dl	8.28504	0.12	0.27		94.4238
	Tolbachik	1941	Inclusion	Sp 133		2.3994	7.21361	14.7191	47.5579	0.183312	0.915507	12.7329	1.001	<dl	7.91196	0.06	0.21		94.6347
	Tolbachik	1941	Inclusion	Sp 135		2.89815	4.47741	17.0431	47.7719	0.206227	0.746861	15.9231	1.25125	<dl	7.16579	0.15	0.34		97.4838
	Tolbachik	1941	Inclusion	Sp 137		1.49625	4.41108	12.8485	46.0604	0.0916562	0.68663	12.649	1.08442	<dl	6.86989	0.09	0.19		86.1977
	Tolbachik	1941	Inclusion	Sp 139		2.31852	8.32467	13.9822	48.4137	0.137484	0.819138	12.8029	1.001	0.27116	8.67099	0.11	0.24		96.7417
	Tolbachik	1941	Inclusion	Sp 142		1.73889	5.52214	14.9269	46.8733	0.160398	0.84323	13.7683	1.15115	<dl	7.28157	0.12	0.23		92.266
	Tolbachik	1941	Inclusion	Sp 143		2.69595	6.86537	16.2873	46.6808	0.274969	0.903461	11.0818	1.11779	<dl	9.61013	0.11	0.29		95.5176
	Tolbachik	1941	Inclusion	Sp 144		2.50724	5.68797	16.4007	47.13	0.206227	0.951645	12.2712	1.21789	<dl	9.15986	0.11	0.28		95.5328
	Tolbachik	1941	Inclusion	Sp 146		3.03295	5.8538	15.6827	48.9913	0.320797	1.4094	10.9139	1.4014	<dl	9.0698	0.05	0.11		96.6761
	Tolbachik	1941	Inclusion	Sp 148		2.88467	6.98145	16.2684	46.7878	0.252055	1.02392	13.6284	1.16784	<dl	7.3073	0.1	0.25		96.3018
	Tolbachik	1941	Inclusion	Sp 150		2.54768	8.93824	14.2467	50.4674	0.137484	0.614353	12.4811	1.06774	<dl	8.3365	0.1	0.25		98.8372
	Tolbachik	1941	Inclusion	Sp 152		2.23764	6.5337	14.0766	48.7987	0.229141	0.614353	13.6424	1.03437	0.258247	8.22072	0.12	0.28		95.646
	Tolbachik	1941	Inclusion	Sp 154		2.10284	6.51712	13.6421	46.745	0.160398	1.06006	13.3905	0.934269	<dl	8.73531	0.09	0.19		93.2876
	Tolbachik	1941	Inclusion	Sp 156		2.30504	7.54527	13.4909	45.4827	0.160398	0.819138	12.3271	1.01769	<dl	8.56807	0.11	0.2		91.7164
	Tolbachik	1941	Inclusion	Sp 158		2.25112	5.72114	13.3964	48.1355	0.160398	0.770953	13.1527	1.01769	<dl	9.50721	0.11	0.34		94.1132
	Tolbachik	1941	Inclusion	Sp 161		2.70943	3.18394	15.6827	49.6759	0.183312	0.879368	13.9083	1.21789	<dl	8.02774	0.09	0.25		95.4685
	Tolbachik	1941	Inclusion	Sp 162		2.76335	4.22867	15.2292	50.1893	0.137484	0.927553	13.3905	1.1011	<dl	8.47802	0.09	0.24		96.4453
	Tolbachik	1941	Inclusion	Sp 164		2.35896	8.12567	14.1711	49.5689	0.160398	1.10824	12.9148	0.967636	0.309897	7.8219	0.14	0.21		97.5076
	Tolbachik	1941	Inclusion	Sp 167		2.00849	4.21208	13.113	47.3868	0.297883	1.13234	15.6713	0.967636	<dl	7.12719	0.06	0.21		91.9167
	Tolbachik	1941	Inclusion	Sp 169		1.94109	2.96836	14.2656	46.2315	0.252055	0.698676	16.7767	1.03437	<dl	6.68978	0.11	0.25		90.8581
	Tolbachik	1941	Inclusion	Sp 170		2.22416	2.70303	15.7016	47.451	0.137484	0.915507	16.5808	1.03437	<dl	6.44535	0.1	0.23		93.1932
	Tolbachik	1941	Inclusion	Sp 171		2.38592	7.18044	14.6813	48.1569	0.0687422	0.819138	13.0268	1.13447	<dl	8.43942	0.11	0.28		95.8931
	Tolbachik	1941	Inclusion	Sp 173		2.56116	5.62164	15.1347	48.6704	0.160398	0.855276	13.5025	1.06774	<dl	8.40083	0.15	0.22		95.9747
	Tolbachik	1941	Inclusion	Sp 174		2.5342	4.89199	15.3615	47.5579	0.274969	0.903461	14.342	1.15115	<dl	8.15639	0.17	0.32		95.1736
	Tolbachik	1941	Inclusion	Sp 176		2.21068	7.64477	13.7365	49.9754	0.11457	0.68663	13.2366	0.850852	<dl	8.02774	0.1	0.26		96.4838
	Tolbachik	1941	Inclusion	Sp 178		2.62856	4.57691	15.7205	46.2957	0.274969	0.722768	14.0342	1.26794	<dl	8.16926	0.13	0.3		93.6908
	Tolbachik	1941	Inclusion	Sp 180		2.3994	7.21361	14.5112	48.2639	0.160398	0.831184	13.7963	1.18452	<dl	8.46515	0.14	0.25		96.8257
	Tolbachik	1941	Inclusion	Sp 181		3.38342	4.64324	17.1754	53.3556	0.366625	2.0358	9.97645	1.38472	<dl	8.19499	0.06	<dl		100.516
	Tolbachik	1941	Inclusion	Sp 184		3.42386	3.13419	14.5868	54.0188	0.687422	2.71038	7.62576	2.36904	<dl	10.0089	0.05	<dl		98.5652
	Tolbachik	1941	Inclusion	Sp 185		2.77683	4.14575	16.4007	48.6062	0.297883	1.26484	14.0622	1.05105	<dl	7.05	0.1	0.27		95.6555
	Tolbachik	1941	Inclusion	Sp 187		2.04893	8.15884	13.6232	48.7346	0.0916562	0.99983	14.2721	0.834169	<dl	7.71898	0.08	0.18		96.4822
	Tolbachik	1941	Inclusion	Sp 190		2.332	5.14073	16.9298	47.7933	0	0.831184	16.6647	1.21789	<dl	6.20092	0.1	0.18		97.1105
	Tolbachik	1941	Inclusion	Sp 191		3.00599	5.52214	16.4196	49.954	0.435367	1.44554	12.4531	1.45145	<dl	9.64873	0.11	0.08		100.336
	Tolbachik	1941	Inclusion	y6-06-03_1		2.0669	5.73219	14.3097	45.2118	0.565213	1.16044	14.0855	1.5738	<dl	6.24809	0.0866667	0.84		90.9536
	Tolbachik	1941	Inclusion	y6-06-03_2		2.48926	5.97541	13.3397	48.0001	<dl	1.08817	10.0371	1.16784	<dl	7.7876	0.13	0.76		89.8852
	Tolbachik	1941	Inclusion	y6-06-03_3		1.09186	13.0674	9.57967	56.5646	<dl	0.421615	5.401	<dl	<dl	7.8605	0.12	0.29		93.9867
	Tolbachik	1941	Inclusion	y6-06-03_4		2.33649	6.30154	14.3916	47.3582	<dl	0.851261	13.5258	0.962075	<dl	7.6761	0.103333	0.773333		93.4031
	Tolbachik	1941	Inclusion	y6-06-03_5		2.45781	5.77641	14.4923	48.0143	<dl	1.01589	13.7217	1.11223	<dl	7.44453	0.113333	0.783333		94.0352
	Tolbachik	1941	Inclusion	y6-06-03_6		1.79281	10.5302	11.9226	46.6166	0	0.602307	11.0958	0.633968	<dl	10.4335	0.11	0.26		93.6278
	Tolbachik	1941	Inclusion	y6-06-03_8		2.64653	5.57742	14.9143	46.4668	0.389539	1.00786	11.996	1.37916	<dl	9.48577	0.12	0.576667		93.8634
	Tolbachik	1941	Inclusion	y6-06-03_9		1.90065	5.88697	12.5839	49.8684	0.229141	1.46963	12.593	1.01769	<dl	6.74124	0.08	1.08		92.2907
	Tolbachik	1941	Inclusion	y7-23-03_1		2.50724	5.53872	13.4342	48.4778	0.229141	0.807091	14.2721	0.900902	<dl	8.72245	0.05	0.92		94.8897
	Tolbachik	1941	Inclusion	y7-23-03_2		2.41288	8.35784	13.3208	49.0341	<dl	0.951645	12.607	0.884219	<dl	9.01834	0.11	0.35		96.5868
	Tolbachik	1941	Inclusion	y7-23-03_3		3.00599	4.47741	14.6435	49.7401	0.366625	1.60214	11.4176	1.31799	<dl	8.73531	0.13	0.16		95.3067
	Tolbachik	1941	Inclusion	y7-23-03_4		2.48028	6.10255	14.2656	44.1349	0.320797	0.903461	14.426	1.13447	<dl	8.16926	0.13	0.29		91.9373
	Tolbachik	1941	Inclusion	y7-23-03_5		2.31852	7.64477	14.2089	46.9803	0.0229141	0.987784	12.9008	1.03437	<dl	7.28157	0.1	0.24		93.3799
	Tolbachik	1941	Inclusion	y7-23-03_6		2.27808	8.17542	13.1697	47.7291	0.11457	0.795045	12.8029	0.967636	<dl	8.3365	0.12	0.3		94.3689
	Tolbachik	1941	Inclusion	y7-23-03_7		2.68247	7.8106	14.4167	48.8629	<dl	0.939599	12.7609	1.08442	<dl	9.01834	0.17	0.42		97.576
	Tolbachik	1941	Inclusion	y7-23-03_8		2.4668	7.8106	13.9444	48.5848	0.206227	0.951645	12.6769	0.867536	<dl	9.14699	0.11	0.25		96.6559
	Tolbachik	1941	Inclusion	y7-23-03_9		2.2646	7.19703	13.1697	44.3061	0.137484	0.770953	12.7889	1.6016	<dl	9.3271	0.15	0.34		91.5634
	Tolbachik	1941	Inclusion	y7-23-03_10		2.18372	4.8754	14.549	49.3764	0.183312	0.879368	13.7264	1.16784	<dl	7.89909	0.1	0.32		94.8405
	Tolbachik	1941	Inclusion	y7-23-03_11		2.30504	3.26685	14.7569	49.6331	0.297883	1.10824	13.9922	1.23457	<dl	7.96342	0.17	0.32		94.5582
	Tolbachik	1941	Inclusion	y7-23-03_12		2.10284	8.2915	12.8296	47.836	0.137484	0.626399	12.551	1.03437	<dl	9.18559	0.1	0.26		94.5948
	Tolbachik	1941	Inclusion	y7-23-03_13		2.34548	7.92668	14.2278	49.2266	0.206227	0.927553	12.579	0.917586	<dl	8.10493	0.12	0.26		96.4619
	Tolbachik	1941	Inclusion	y7-23-03_14		2.10284	7.82718	13.4909	48.1569	0.252055	0.855276	13.6004	1.11779	<dl	9.22418	0.16	0.22		96.6276
	Tolbachik	1941	Inclusion	y7-23-03_15		2.15676	8.25834	12.4517	49.8042	0.206227	0.831184	13.8243	0.950952	<dl	8.68385	0.09	0.26		97.1676
	Tolbachik	1941	Inclusion	y7-23-03_16		2.56116	7.32969	13.302	48.1355	0.183312	1.0962	13.0687	1.08442	<dl	8.69672	0.13	0.8		95.4577
	Tolbachik	1941	Inclusion	y7-23-03_17		2.11632	7.67793	12.395	48.05	0.229141	0.915507	12.9288	1.06774	<dl	8.94115	0.09	0.31		94.3216
	Tolbachik	1941	Inclusion	y7-23-03_18		2.07589	7.21361	13.4909	47.451	0.252055	0.879368	13.6984	1.06774	<dl	8.90256	0.13	0.65		95.0314
	Tolbachik	1941	Inclusion	y7-23-03_19		2.21068	7.16386	13.5098	48.5848	<dl	0.602307	14.2861	1.01769	<dl	7.65466	0.13	0.87		95.0299
	Tolbachik	1941	Inclusion	y7-23-03_20		1.90065	5.93672	13.7743	48.9485	<dl	0.626399	14.5799	1.03437	<dl	7.21725	0.14	0.78		94.0181
	Tolbachik	1941	Inclusion	Mg-Ol-1941-1		1.84673	8.14226	13.2831	47.451	0.274969	0.746861	16.3989	0.934269	<dl	6.3167	0.11	0.19		95.3947
	Tolbachik	1941	Inclusion	Mg-Ol-1941-2		2.84423	7.24677	17.5911	48.5206	0.183312	0.795045	14.9997	1.18452	<dl	5.93075	0.24	0.12		99.296
	Tolbachik	1941	Inclusion	Mg-Ol-1941-3		2.25112	6.89853	17.1565	47.5365	0.160398	0.891414	14.9017	1.5015	<dl	5.59626	0.08	0.18		96.894
	Tolbachik	1941	Inclusion	Mg-Ol-1941-4		2.61508	8.15884	15.0214	47.451	0.160398	1.01188	13.9782	1.21789	<dl	7.24298	0.19	0.19		96.8576
	Tolbachik	1941	Inclusion	Mg-Ol-1941-5		2.72291	9.20357	13.9633	47.6649	0.160398	0.554122	14.0902	1.03437	<dl	7.83477	0.05	0.24		97.2285
	Tolbachik	1941	Inclusion	Mg-Ol-1941-6		2.57464	7.01461	14.8891	49.0341	0.274969	0.662538	13.9642	1.26794	<dl	7.33303	0.12	0.26		97.0152
	Tolbachik	1941	Inclusion	Mg-Ol-1941-7		2.4668	9.71764	11.9415	45.5041	0.252055	0.68663	9.79455	0.700702	<dl	8.29791	0.11	0.33		89.3619
	Tolbachik	1941	Inclusion	Sul2-7a		3.22167	0.845733	16.0228	53.7193	<dl	1.65032	12.8588	1.45145	<dl	3.21624	0.18	0.85		92.9863
	Tolbachik	1941	Inclusion	Sul2-7b		2.70943	1.54222	15.6071	51.858	<dl	0.963691	14.4959	1.71839	<dl	4.10393	0.21	0.7		92.9987
	Tolbachik	1941	Inclusion	N9-1		2.11632	3.84726	14.0955	48.1569	0.366625	0.638445	12.0473	1.78512	<dl	7.32017	0.12	0.76		90.3737
	Tolbachik	1941	Inclusion	N7-1-4		2.65552	6.99803	11.7904	47.9858	0.504109	1.32508	8.11548	1.48482	<dl	11.1797	0.13	0.52		92.0389
	Tolbachik	1941	Inclusion	N7-1-4a		n/m	n/m	n/m	n/m	n/m	n/m	n/m	n/m	n/m	n/m	0.11	0.7
	Tolbachik	1941	Inclusion	N9-3a		n/m	n/m	n/m	n/m	n/m	n/m	n/m	n/m	n/m	n/m	0.23	0.8
	Tolbachik	1941	Inclusion	N6-6b		2.35896	6.51712	12.4517	43.215	<dl	0.807091	12.2432	1.28462	<dl	8.28504	0.09	0.97		87.1627
	Tolbachik	1941	Inclusion	N6-9		1.86021	4.8754	13.1697	46.1459	<dl	0.650492	13.2226	1.001	<dl	8.23358	0.07	0.72		89.159
	Tolbachik	1941	Inclusion	N3-6a		1.95457	10.7955	13.1319	47.6221	0.458281	1.13234	12.7049	2.20221	<dl	12.1574	0.28	0.5		102.159
	Tolbachik	1941	Inclusion	N7-1-4b		1.88717	9.02116	13.6798	46.7664	<dl	2.92721	6.03064	1.7017	<dl	10.0733	0.08	0.64		92.0874
	Tolbachik	1941	Inclusion	N7-1-4c		3.14079	6.38446	15.4938	47.7077	<dl		12.2852	0.900902	<dl	7.51314	0.13	0.37		93.4259
	Tolbachik	1941	Inclusion	y4-10-16_1		1.982	6.362	15.615	47.328	0.101	0.711	15.075	1.529	0.262	8.134	0.093	0.272		97.202
	Tolbachik	1941	Inclusion	y4-10-16_2		2.119	6.271	15.572	46.108	0.26	0.67	15.684	1.464	0.196	8.366	0.092	0.247		96.853
	Tolbachik	1941	Inclusion	y4-10-16_3		2.124	6.868	15.471	46.651	0.22	0.684	15.729	1.467	0.119	8.341	0.101	0.243		97.899
	Tolbachik	1941	Inclusion	y4-10-16_4		1.899	5.505	16.108	47.282	0.286	0.544	16.749	1.508	0.11	8.211	0.085	0.237		98.414
	Tolbachik	1941	Inclusion	y4-10-16_5		1.165	5.318	16.425	50.455	0.099	0.693	16.592	1.372	0.049	6.991	0.104	0.263		99.477
	Tolbachik	1941	Inclusion	y4-10-16_6		1.501	7.833	14.569	49.157	0.047	0.858	14.258	1.268	0.212	7.589	0.093	0.236		97.409
	Tolbachik	1941	Inclusion	y4-10-16_7		1.431	7.679	14.712	49.785	0.072	0.729	14.201	1.053	<dl	7.796	0.081	0.235		97.774
	Tolbachik	1941	Inclusion	y4-10-16_8		1.442	7.748	14.562	49.781	0.056	0.733	14.43	1.036	0.125	7.957	0.085	0.243		98.073
	Tolbachik	1941	Inclusion	y4-10-16_9		1.561	7.845	14.641	49.955	0.054	0.789	14.125	1.043	0.147	7.532	0.085	0.227		97.857
	Tolbachik	1941	Inclusion	y4-10-16_10		1.422	7.871	14.559	49.926	0.059	0.782	14.231	1.045	0.094	7.36	0.079	0.221		97.555
	Tolbachik	1941	Inclusion	y4-10-16_11		1.914	7.123	15.896	49.893	0.054	0.754	15.763	1.324	0.078	7.101	0.083	0.272		100.177
	Tolbachik	1941	Inclusion	y4-10-16_12		1.3	6.816	15.994	49.934	0.045	0.815	16.345	1.174	0.122	6.935	0.098	0.252		99.708
	Tolbachik	1941	Inclusion	y4-10-16_13		0.987	6.755	15.485	49.859	0.05	0.592	16.09	1.261	<dl	7.717	0.085	0.273		99.154
	Tolbachik	1941	Inclusion	y4-10-16_14		2.729	5.744	17.125	51.269	0.122	1.496	12.864	1.312	0.192	9.582	0.062	0.096		102.401
	Tolbachik	1941	Inclusion	y4-10-16_15		2.84	5.604	16.88	51.62	0.063	1.53	13.181	1.473	0.112	9.515	0.052	0.095		102.853
	Tolbachik	1941	Inclusion	y4-10-16_16		2.691	5.777	16.819	51.28	0.079	1.57	13.265	1.395	0.063	9.295	0.054	0.116		102.341
	Tolbachik	1941	Inclusion	y4-10-16_17		2.852	4.596	15.544	53.12	0.127	1.991	10.628	1.865	0.29	9.659	0.049	0.001		100.432
	Tolbachik	1941	Inclusion	y4-10-16_18		3.03	4.77	17.217	53.795	0.086	1.847	11.677	1.275	0.22	8.293	0.038	0.016		102.044
	Tolbachik	1941	Inclusion	y4-10-16_19		2.805	4.84	16.959	51.383	0.113	1.618	11.177	1.361	0.183	9.216	0.036	0.034		99.542
	Tolbachik	1941	Inclusion	y4-10-16_20		1.277	9.072	6.909	53.278	0.025	0.495	16.034	0.74	0.127	8.317	0.034	0.081		96.262
	Tolbachik	1941	Inclusion	y4-10-16_21		1.298	9.023	7.026	53.462	0.038	0.478	15.914	0.575	0.157	8.252	0.033	0.081		96.18
	Tolbachik	1941	Inclusion	y4-10-16_22		1.343	7.746	12.872	47.425	0.043	1.303	16.776	0.832	0.153	7.544	0.053	0.204		96.141
	Tolbachik	1941	Inclusion	y4-10-16_23		1.092	6.124	16.147	48.886	0.025	1.06	17.679	1.06	0.111	6.237	0.058	0.177		98.545
	Tolbachik	2013	Inclusion	Spectrum_V_1		2.17	4.46	15.88	50.97	0.85	2.43	7.23	2.11	0.23	11.06	0.052	0.0296		97.4716
	Tolbachik	2013	Inclusion	Spectrum_V_2		2.59	4.37	15.54	50.49	0.92	2.44	7.23	2.11	0.23	10.95	0.052	0.028		96.95
	Tolbachik	2013	Inclusion	Spectrum_V_3		2.54	4.45	15.81	50.7	0.8	2.41	7.33	2.12	0.16	11.06	0.046	0.032		97.458
	Tolbachik	2013	Inclusion	Spectrum_V_4		3.11	5.64	13.87	46.17	3.33	2.09	8.6	1.48	0.2	12.78	0.058	0.032		97.36
	Tolbachik	2013	Inclusion	Spectrum_V_5		3.45	3.47	16.16	52.56	0.69	3.11	6.34	1.56	0.19	9.9	0.057	0.0212		97.5082
	Tolbachik	2013	Inclusion	Spectrum_V_6		3.36	4.06	15.88	50.62	0.8	2.5	7.37	1.82	0.13	10.39	0.064	0.0336		97.0276
	Tolbachik	2013	Inclusion	Spectrum_V_7		3.14	4.57	15.48	49.89	1.05	2.41	7.39	1.81	0.16	11.41	0.059	0.0424		97.4114
	Tolbachik	2013	Inclusion	Spectrum_V_9		3.7	3.13	15.93	52.53	0.83	3.16	6.77	1.93	0.26	10.14	0.066	0.032		98.478
	Tolbachik	2013	Inclusion	Spectrum_V_10		3.9	3.26	14.37	50.98	0.93	2.39	7.63	2.62	0.26	12.65	0.024	<dl		99.0188
	Tolbachik	2013	Inclusion	Spectrum_V_11		3.23	3.48	15.49	52.45	0.92	3.18	6.97	1.73	0.22	9.85	0.062	0.0284		97.6104
	Tolbachik	2013	Inclusion	Spectrum_V_12		2.81	3.47	15.5	51.18	0.9	2.67	7.19	2.11	0.15	10.32	0.048	0.0252		96.3732
	Tolbachik	2013	Inclusion	Spectrum_V_13		3.31	4.04	15.57	50.62	0.71	2.65	7.77	1.97	0.23	10.5	0.049	0.0284		97.4474
	Tolbachik	2013	Inclusion	Spectrum_V_14		3.06	4.31	15.49	51.15	0.76	2.55	7.09	1.75	0.17	10.83	0.049	0.0284		97.2374
	Tolbachik	2013	Inclusion	Spectrum_V_29		2.22	5.49	15.99	49.79	0.36	1.51	11.69	1.23	0.22	10.03	0.067	<dl		98.5994
	Tolbachik	2013	Inclusion	Spectrum_V_31		3.2	2.97	15.91	55.03	0.78	3.25	6.03	1.73	0.19	9.74	0.07	0.028		98.928
	Tolbachik	2013	Inclusion	Spectrum_V_32		2.96	3.38	15.58	51.92	0.78	2.64	6.86	1.83	0.25	9.78	0.065	0.0376		96.0826
	Tolbachik	2013	Inclusion	Spectrum_V_35		5.63	1.5	21.77	57.5	0.36	1.7	8.22	1.33	0.01	2.62	0.031	<dl		100.672
	Tolbachik	2013	Inclusion	Spectrum_V_36		3.71	4.08	16.47	50.54	0.83	2.62	7.4	2.14	0.16	10.95	0.045	0.0324		98.9774
	Tolbachik	2013	Inclusion	Spectrum_V_37		3.54	3.46	14.33	51.93	0.92	2.85	7.1	2.38	0.26	11.6	0.04	0.0072		98.4172
	Tolbachik	2013	Inclusion	Spectrum_V_38		3.35	4.34	15.97	50.76	0.79	2.46	7.23	2.01	0.15	10.68	0.052	0.0248		97.8168
	Tolbachik	2013	Inclusion	Spectrum_V_42		3.83	3.88	16.78	50.78	0.89	2.77	7.36	1.88	0.12	10.37	0.049	0.0368		98.7458
	Tolbachik	2013	Inclusion	Spectrum_V_43		5.09	3.49	15.76	50.59	0.87	1.59	6.94	2.06	0.15	12.61	0.045	0.0444		99.2394
	Tolbachik	2013	Inclusion	Spectrum_V_44		2.58	6.11	11.75	42.58	5.64	1.8	10.85	1.32	0.28	16.33	0.05	0.0292		99.3192
	Tolbachik	2013	Inclusion	Spectrum_V_45		2.56	6.06	11.38	42.14	6.06	1.93	11.23	1.08	0.18	16.32	0.034	0.0256		98.9996
	Tolbachik	2013	Inclusion	Spectrum_V_46		5.18	3.14	16.18	52.45	0.63	1.79	6.23	1.94	0.16	11.3	0.017	0.0356		99.0526
	Tolbachik	2013	Inclusion	Spectrum_V_51		3.76	4.2	15.72	50.26	0.74	2.52	7.19	1.95	0.29	10.92	0.03	0.03		97.62
	Tolbachik	2013	Inclusion	Spectrum_V_52		3.67	4.47	15.62	50.04	0.83	2.42	7.31	1.92	0.31	10.89	0.08	0.01		97.5
	Tolbachik	2013	Inclusion	Spectrum_V_54		3.59	4.4	15.66	50.71	0.85	2.48	7.11	2.01	<dl	10.44	0.02	0.07		97.41
	Tolbachik	2013	Inclusion	Spectrum_V_55		3.35	4.54	14.99	49.12	1.09	2.41	7.17	1.69	<dl	11.18	0.07	0.11		95.81
	Tolbachik	2013	Inclusion	Spectrum_V_58		4.24	3.11	15.76	51.96	0.83	3.14	6.82	1.7	0.27	10	0.07	0.07		98.01
	Tolbachik	2013	Inclusion	Spectrum_V_60		4.09	4.05	15.5	49.53	0.83	2.62	7.57	1.9	0.23	10.65	0.05	0.05		97.09
	Tolbachik	2013	Inclusion	Spectrum_V_61		3.29	4.23	15.45	50.62	0.7	2.55	7.01	1.87	0.2	10.43	0.06	0.07		96.51
	Tolbachik	2013	Inclusion	Spectrum_V_62		4.03	3.69	15.67	49.25	0.84	2.61	7.74	1.72	0.26	13.09	0.09	0.02		98.93
	Tolbachik	2013	Inclusion	Spectrum_V_67		2.32	3.64	14.66	56.12	0.98	2.72	6.78	2.16	0.2	6.33	0.12	0.02		95.98
	Tolbachik	2013	Inclusion	Spectrum_V_68		2.98	2.31	16.08	52.84	0.9	3.04	5.92	1.75	0.2	10.29	0.05	0.02		96.36
	Tolbachik	2013	Inclusion	Spectrum_V_69		3.24	2.48	15.86	53.37	0.97	3.19	6.7	1.87	0.2	9.43	0.08	0.04		97.4
	Tolbachik	2013	Inclusion	Spectrum_V_70		3.45	2.38	15.65	53.2	0.8	2.98	6	1.64	0.25	10.15	0.06	0.03		96.58
	Tolbachik	2013	Inclusion	Spectrum_V_71		3.77	2.97	14.53	51.95	1.77	3.02	6.52	1.39	0.27	10.88	0.07	0.12		97.37
	Tolbachik	2013	Inclusion	Spectrum_V_72		3.32	2.81	14.57	50.86	2.37	2.9	7.26	1.36	0.29	10.74	0.1	0.08		96.66
	Tolbachik	2013	Inclusion	Spectrum_V_73		3.06	3.88	15.27	49.69	1.97	2.05	7.58	1.07	0.25	11.01	0.05	0.11		96.1
	Tolbachik	2013	Inclusion	Spectrum_V_74		3.23	3.45	15.57	51.07	1.3	2.36	7.13	1.04	0.24	10.18	0.06	0.07		95.77
	Tolbachik	2013	Inclusion	Spectrum_V_75		3.76	3.04	15.59	52.23	0.73	2.89	6.82	1.69	0.25	9.05	0.05	0.06		96.2
	Tolbachik	2013	Inclusion	Spectrum_V_77		3.65	3.04	15.72	51.96	0.79	2.61	7.59	1.95	<dl	9.89	0.05	0.08		97.42
	Tolbachik	2013	Inclusion	Spectrum_G_5		n/m	n/m	n/m	n/m	n/m	n/m	n/m	n/m	n/m	n/m	0.1	0.08
	Tolbachik	2013	Inclusion	Spectrum_G_6		n/m	n/m	n/m	n/m	n/m	n/m	n/m	n/m	n/m	n/m	0.08	0.05
	Tolbachik	2013	Inclusion	Spectrum_G_11		n/m	n/m	n/m	n/m	n/m	n/m	n/m	n/m	n/m	n/m	0.07	0.06
	Tolbachik	2013	Inclusion	Spectrum_G_15		n/m	n/m	n/m	n/m	n/m	n/m	n/m	n/m	n/m	n/m	0.05	0.04
	Tolbachik	2013	Inclusion	Spectrum_G_22		n/m	n/m	n/m	n/m	n/m	n/m	n/m	n/m	n/m	n/m	0.04	0.09
	Tolbachik	2013	Inclusion	Spectrum_G_24		n/m	n/m	n/m	n/m	n/m	n/m	n/m	n/m	n/m	n/m	0.05	0.07
	Tolbachik	2013	Inclusion	Spectrum_G_32		n/m	n/m	n/m	n/m	n/m	n/m	n/m	n/m	n/m	n/m	0.05	0.09
	Tolbachik	2013	Inclusion	Spectrum_G_36		n/m	n/m	n/m	n/m	n/m	n/m	n/m	n/m	n/m	n/m	0.06	0.04
	Tolbachik	2013	Inclusion	Spectrum_G_37		n/m	n/m	n/m	n/m	n/m	n/m	n/m	n/m	n/m	n/m	0.07	0.04
	Tolbachik	2013	Inclusion	Spectrum_G_38		n/m	n/m	n/m	n/m	n/m	n/m	n/m	n/m	n/m	n/m	0.05	0.04
	Tolbachik	2013	Inclusion	Spectrum_G_39		n/m	n/m	n/m	n/m	n/m	n/m	n/m	n/m	n/m	n/m	0.05	0.04
	Tolbachik	2013	Inclusion	Spectrum_G_40		n/m	n/m	n/m	n/m	n/m	n/m	n/m	n/m	n/m	n/m	0.05	0.03
	Tolbachik	2013	Inclusion	Spectrum_G_41		n/m	n/m	n/m	n/m	n/m	n/m	n/m	n/m	n/m	n/m	0.06	0.03
	Tolbachik	2013	Inclusion	Spectrum_G_42		n/m	n/m	n/m	n/m	n/m	n/m	n/m	n/m	n/m	n/m	0.08	0.07
	Tolbachik	2013	Inclusion	Spectrum_G_43		n/m	n/m	n/m	n/m	n/m	n/m	n/m	n/m	n/m	n/m	0.06	0.05
	Tolbachik	2013	Inclusion	Spectrum_G_44		n/m	n/m	n/m	n/m	n/m	n/m	n/m	n/m	n/m	n/m	0.06	0.03
	Tolbachik	2013	Inclusion	Fe-Ol-2013-1		2.92511	4.494	15.9472	50.8525	0.779078	2.32491	7.52781	2.36904	<dl	10.2791	0.04	0.03		97.4988
	Tolbachik	2013	Inclusion	Fe-Ol-2013-2		3.26211	5.50556	13.9822	47.13	3.34545	2.26467	8.64719	1.78512	<dl	11.5913	0.21	0.09		97.5137
	Tolbachik	2013	Inclusion	Fe-Ol-2013-3		2.84423	4.80907	14.1522	47.0659	2.13101	2.04784	8.24141	1.85185	<dl	12.7492	0.09	0.11		95.8927
	Tolbachik	2013	Inclusion	Fe-Ol-2013-4		3.45082	4.01309	15.3048	51.7083	0.664508	2.6622	7.192	1.91859	<dl	10.3434	0.17	0.17		97.2577
	Tolbachik	2013	Inclusion	Fe-Ol-2013-5		3.5991	4.1955	14.8702	49.9968	0.916562	2.20444	7.63975	2.01869	<dl	10.1633	0.03	<dl		95.6044
	Tolbachik	2013	Inclusion	Fe-Ol-2013-6		3.35646	4.56033	14.6057	49.8684	0.96239	2.349	7.08006	2.01869	<dl	10.961	0.05	<dl		95.762
	Tolbachik	2013	Inclusion	Fe-Ol-2013-7		2.83075	4.54374	15.4749	51.3232	0.824906	2.60197	7.61177	1.91859	<dl	10.485	0.03	0.03		97.6147
	Tolbachik	2013	Inclusion	Fe-Ol-2013-8		3.74738	4.07942	11.6014	47.0445	0.572851	2.69834	4.3096	2.11879	<dl	23.3757	0.08	0.22		99.5479
	Tolbachik	2013	Inclusion	Fe-Ol-2013-9		2.96555	4.34475	12.2816	47.6649	0.504109	2.38514	4.44952	2.28562	<dl	22.4622	0.06	<dl		99.3434
	Tolbachik	2013	Inclusion	Fe-Ol-2013-10		1.14578	6.99803	10.5622	48.4565	0.641594	0.795045	10.8859	0.867536	<dl	10.7937	0.17	0.13		91.1463
	Tolbachik	2013	Inclusion	Fe-Ol-2013-11		2.07589	10.779	10.5622	46.4668	0.160398	0.746861	9.06696	0.850852	<dl	11.1668	0.19	0.16		91.8758
	Tolbachik	2013	Inclusion	Fe-Ol-2013-12		4.5292	3.23369	15.3804	51.1948	0.73325	2.38514	7.13603	2.00201	<dl	10.3048	0.08	0.11		96.8994
	Tolbachik	2013	Inclusion	Fe-Ol-2013-13		3.23515	3.91359	14.6624	51.366	1.6269	2.31286	7.28994	1.91859	<dl	10.3177	0.12	0.1		96.6431
	Tolbachik	2013	Inclusion	Fe-Ol-2013-14		4.05741	2.90203	15.0592	53.7621	0.939476	2.85494	7.10805	2.11879	<dl	10.8709	0.06	0.06		99.6728
	Tolbachik	2013	Inclusion	Fe-Ol-2013-15		4.12481	1.94021	14.6246	56.9283	0.84782	3.85476	4.81332	2.25226	<dl	8.73531	0.1	0.06		98.1214
	Tolbachik	2013	Inclusion	y4-04-05_1		2.066	3.235	15.786	51.676	0.129	2.546	8.44	1.784	0.099	9.464	0.027	0.025		95.225
	Tolbachik	2013	Inclusion	y4-04-05_2		2.546	2.53	15.967	51.139	0.078	2.509	7.886	2.092	0.115	8.533	0.031	0.042		93.353
	Tolbachik	2013	Inclusion	y4-04-05_3		1.803	3.186	15.149	51.849	0.148	2.821	7.559	2.177	0.107	9.666	0.032	0.01		94.4
	Tolbachik	2013	Inclusion	y4-04-05_4		2.599	3.455	14.83	53.19	0.127	3.108	7.239	1.989	0.177	9.045	0.025	0.003		95.61
	Tolbachik	2013	Inclusion	y4-04-05_5		1.653	3.452	14.74	53.254	0.066	2.76	7.275	2.082	0.143	9.495	0.036	0.012		94.825
	Tolbachik	2013	Inclusion	y4-04-05_6		1.844	2.853	15.992	50.97	0.077	2.346	7.85	1.957	0.208	9.838	0.02	0.027		93.774
	Tolbachik	2013	Inclusion	y4-04-05_7		1.903	1.847	16.29	51.202	0.078	2.531	8.61	2.059	0.206	8.983	0.024	0.024		93.551
	Tolbachik	2013	Inclusion	y4-04-05_8		1.463	2.215	16.78	52.069	0.028	2.544	8.839	2.072	0.286	9.403	0.026	0.029		95.468
	Tolbachik	2013	Inclusion	y4-04-05_9		1.184	2.678	15.377	54.322	0.027	2.841	8.084	2.242	0.298	9.779	0.019	0.015		96.568
	Tolbachik	2013	Inclusion	y4-04-05_10		2.409	2.54	15.185	54.416	0.061	2.419	8.158	2.157	0.044	9.771	0.017	0.008		97.141
	Tolbachik	2013	Inclusion	y4-04-05_11		2.055	2.826	15.644	52.666	0.01	3.171	7.467	2.109	0.268	9.39	0.017	0.012		95.367
	Tolbachik	2013	Inclusion	y4-04-05_12		2.752	2.895	16.111	52.218	0.056	3.043	8.239	1.889	0.108	9.199	0.031	0.022		96.455
	Tolbachik	2013	Inclusion	y4-04-05_13		2.562	3.08	14.434	53.02	0.07	3.225	7.204	2.343	0.27	9.89	0.012	0.004		95.844
	Tolbachik	2013	Inclusion	y4-04-05_14		2.469	3.243	14.11	53.135	0.056	3.408	7.183	2.432	0.227	9.491	0.017	0		95.544
	Tolbachik	2013	Inclusion	y4-04-05_15		2.711	3.167	14.193	52.033	0.078	3.199	7.271	2.127	0.187	10.211	0.016	0.002		95.008
	Tolbachik	2013	Inclusion	y4-04-05_16		3.624	1.853	15.757	50.862	0.056	2.533	9.178	1.752	0.112	8.736	0.016	0.033		94.4
	Tolbachik	2013	Inclusion	y4-04-05_17		2.202	0.848	18.128	55.53	0.057	4.401	7.256	1.621	0.134	5.174	0.026	0.005		95.248
	Tolbachik	2013	Inclusion	y4-04-05_18		1.706	1.053	17.944	56.366	0.057	3.265	7.254	1.863	0.159	4.68	0.025	0.018		94.231
	Tolbachik	2013	Inclusion	y4-04-05_19		3.594	1.283	14.747	56.632	0.052	4.586	4.17	1.734	0.204	6.353	0.032	0		93.183
	Tolbachik	2013	Inclusion	y4-04-05_20		3.891	1.98	14.873	53.927	0.068	3.283	5.161	1.783	0.152	7.942	0.022	0.006		92.936
	Tolbachik	2013	Inclusion	y4-04-05_21		3.229	1.731	15.727	54.715	0.065	4.855	5.094	1.458	0.182	6.446	0.028	0.011		93.359
	Tolbachik	2013	Inclusion	y4-04-05_22		2.058	0.955	16.359	53.896	0.082	4.191	7.849	1.711	0.088	5.148	0.029	0.004		92.282
	Tolbachik	2013	Inclusion	y4-04-05_23		1.676	1.01	18.084	52.857	0.055	2.7	9.053	1.925	0.213	5.381	0.027	0.144		92.912
	Tolbachik	2013	Inclusion	y4-04-05_24		1.964	1.122	17.336	51.655	0.138	3.443	9.647	1.975	0.079	5.664	0.02	0.047		93.011
	Tolbachik	2013	Inclusion	y4-04-05_25		1.385	1.021	17.318	53.071	0.094	2.826	8.812	1.45	0.099	5.401	0.03	0.021		91.429
	Tolbachik	2013	Inclusion	y4-04-05_26		1.073	3.218	17.678	52.997	0.097	2.516	8.487	1.828	0.11	7.049	0.021	0.021		94.985
	Tolbachik	2013	Inclusion	y4-04-05_27		0.888	1.45	13.575	58.599	0.068	3.591	5.19	2.779	0.109	6.226	0.058	0.001		92.425
	Tolbachik	2013	Inclusion	y4-10-06_1		3.05	3.38	15.72	52.38	0.54	2.66	8.9	1.99	0.26	9.78	0.1	0.06		98.56
	Tolbachik	2013	Inclusion	y4-10-06_2		3.13	3.7	14.88	52.52	0.45	1.84	10.17	1.64	0.29	10.81	0.14	0.01		99.29
	Tolbachik	2013	Inclusion	y4-10-06_4		2.82	4.4	16.35	48.41	0	0.7	14.36	0.93	0.33	5.66	0.2	0.29		94.12
	Tolbachik	2013	Inclusion	y4-10-06_5		2.31	4.5	16.2	48.83	0.23	0.62	15.37	1.15	<dl	5.33	0.16	0.37		95.07
	Tolbachik	2013	Inclusion	y4-10-06_6		3.19	4.25	17.39	50.17	0.24	0.6	15.7	1.3	0.02	5.18	0.2	0.3		98.52
	Tolbachik	2013	Inclusion	y4-10-06_7		2.54	7.84	13.9	47.81	0.01	0.7	12.76	1.45	0.02	8.36	0.17	0.29		95.83
	Tolbachik	2013	Inclusion	y4-10-06_9		4.64	1.13	24.76	56.56	0.1	0.96	10.75	0.39	0.11	2.81	0.07	0.04		102.21
	Tolbachik	2013	Inclusion	y4-10-06_10		3.46	4.27	14.49	55.57	0.91	2.63	7.43	1.74	0.24	10.36	0.04	0		100.9
	Tolbachik	1941	Glass	Spectrum_V_16		3.58	2.7	14.31	56.51	1.14	4.11	5.34	2.33	0.23	9.13	0.054	<dl		99.434
	Tolbachik	1941	Glass	Spectrum_V_17		3.29	2.63	14.18	55.45	1.05	3.68	5.74	2.22	0.25	9.6	0.056	<dl		98.146
	Tolbachik	1941	Glass	Spectrum_V_19		3.5	2.54	14.17	55.61	1.06	3.73	5.53	2.28	0.14	9.53	0.05	<dl		98.1404
	Tolbachik	1941	Glass	Spectrum_V_20		3.78	2.45	14.36	56.1	0.94	3.42	5.58	2.26	0.16	9.57	0.054	<dl		98.678
	Tolbachik	1941	Glass	Spectrum_V_22		2.76	2.42	13.73	55.43	1.14	3.8	5.68	2.43	0.19	9.7	0.048	<dl		97.3284
	Tolbachik	1941	Glass	Spectrum_V_23		3.52	3.4	14.63	53.59	0.98	3.18	6.78	2.11	0.13	10.31	0.038	<dl		98.668
	Tolbachik	1941	Glass	Spectrum_V_24		3.47	3.25	14.72	53.3	0.94	3.17	6.55	2.21	0.21	9.95	0.046	<dl		97.818
	Tolbachik	1941	Glass	Spectrum_V_25		3.33	2.51	14.14	55.6	1.09	3.81	5.66	2.34	0.19	9.6	0.048	<dl		98.3188
	Tolbachik	1941	Glass	Spectrum_V_26		3.89	2.57	14.84	57.19	1.05	3.38	5.94	2.21	0.18	8.65	0.049	<dl		99.9506
	Tolbachik	1941	Glass	Spectrum_V_27		3.81	2.5	14.94	56.85	1.22	3.3	6.15	2.15	0.19	8.75	0.05	<dl		99.912
	Tolbachik	1941	Glass	Spectrum_V_48		3.34	3.43	14.66	52.87	1.04	3.29	7.1	2.39	0.25	10.69	0.036	0.0036		99.0996
	Tolbachik	1941	Glass	Spectrum_V_49		3.56	3.56	14.89	52.82	1.03	3.53	7.08	2.29	0.24	10.81	0.04	0.008		99.858
	Tolbachik	1941	Glass	Spectrum_V_50		3.32	3.63	14.44	52.44	1.1	3.4	7.04	2.5	0.14	10.94	0.044	0.0112		99.0052
	Tolbachik	1941	Glass	y3-11-03_1		4.17873	2.38795	16.8164	54.1899	0.435367	2.62606	7.17801	1.73507	<dl	9.03121	0.03	0.02		98.5787
	Tolbachik	1941	Glass	y3-11-03_2		3.47778	3.76434	14.3979	52.1789	0.96239	2.77061	7.40188	2.26894	<dl	11.2954	0.15	<dl		98.5182
	Tolbachik	1941	Glass	y3-11-03_3		3.7339	4.34475	14.3979	54.8103	0.549937	2.44537	8.8011	2.08542	<dl	10.0604	0.02	0.01		101.229
	Tolbachik	1941	Glass	y3-11-03_4		2.95207	6.94828	13.3586	48.0714	0.641594	2.27672	6.26851	1.96864	<dl	13.2123	0.06	<dl		95.6981
	Tolbachik	1941	Glass	y3-11-03_5		3.76086	1.95679	13.7743	55.3238	1.1457	3.66203	5.55491	2.31899	<dl	8.76104	0.05	<dl		96.2584
	Tolbachik	1941	Glass	y3-11-03_6		3.76086	3.00152	15.7961	51.9008	0.481195	2.1924	7.7237	2.01869	<dl	10.4721	0.09	0.08		97.3473
	Tolbachik	1941	Glass	y3-11-03_7		3.43734	2.86886	15.5882	51.3232	0.343711	2.30081	8.10149	2.18552	<dl	10.768	0	0.08		96.9171
	Tolbachik	1941	Glass	y3-11-03_8		3.77434	3.59851	15.4749	51.152	0.664508	2.349	7.49983	1.83517	<dl	11.2954	0.07	0.08		97.6437
	Tolbachik	1941	Glass	y3-11-03_9		3.01947	3.06786	14.9836	53.4412	0.801992	2.9513	6.49239	2.25226	<dl	9.5844	0.1	<dl		96.5944
	Tolbachik	1941	Glass	y3-11-03_10		3.89565	3.93017	15.7583	53.2272	0.801992	2.46946	7.44386	1.78512	<dl	10.0218	0.1	0.05		99.3336
	Tolbachik	1941	Glass	y3-11-03_11		3.51822	3.5156	15.4182	51.9864	0.84782	2.45741	6.68828	1.65165	<dl	9.55867	0	0.02		95.6422
	Tolbachik	1941	Glass	y3-11-03_12		3.47778	3.73118	15.4938	53.1844	0.801992	2.28877	7.02409	1.93527	<dl	10.3563	0.09	0.05		98.2936
